# Supplementary material for: Hydrophobic Sand Is a Non-Toxic Method of Urine Collection, Appropriate for Urinary Metal Analysis in the Rat
Source: MDPI journal article supplement (doi:10.3390/toxics5040025), 2017-10-11
Supplement: s1 [file s1]

# Supplementary Materials: Hydrophobic sand is a non-toxic method of urine collection, appropriate for urinary metal analysis in the rat

Jessica F. Hoffman, Vernieda B. Vergara, Steven R. Mog and John F. Kalinich

Table S1. ICP-MS operating conditions and parameters.

| ICP-MS operating conditions and parameters |                                 |
|--------------------------------------------|---------------------------------|
| <i>Instrument Parameters</i>               |                                 |
| Nebulizer type                             | Concentric                      |
| Spray chamber                              | Conical, with impact bead       |
| Sampler cone                               | Nickel, 1mm orifice diameter    |
| Skimmer cone                               | Nickel, 0.7 mm orifice diameter |
| Sample uptake rate                         | 1.0 ml/min                      |
| Sample read delay                          | 45 sec                          |
| <i>Plasma conditions</i>                   |                                 |
| RF power                                   | 1400 W                          |
| Plasma argon gas flow                      | 13.0 L/min                      |
| Auxiliary argon gas flow                   | 0.80 L/min                      |
| Nebulizer gas flow                         | 0.91 L/min                      |
| <i>Mass spectrometer settings</i>          |                                 |
| Scanning mode                              | Peak jump                       |
| Sweeps                                     | 100                             |
| Dwell time                                 | 500 $\mu$ s                     |
| Channels/mass                              | 1                               |
| Acquisition time                           | 10 sec                          |
| Number of readings/replicate               | 3                               |
| Number of replicates                       | 2                               |
